# Supplementary material for: The Diagnostic Value of the CA19-9 and Bilirubin Ratio in Patients with Pancreatic Cancer, Distal Bile Duct Cancer and Benign Periampullary Diseases, a Novel Approach
Source: MDPI journal article supplement (doi:10.3390/cancers14020344), 2022-01-11
Supplement: s1 [file s1]

## Supplementary Materials

**Table S1.** Internal validation with 1000 bootstrap replicates.

| Original (Corrected)                 | Performance Measures |          | Model Ratio |          | CA19-9 |          | Bilirubin |          | CA19-9 + Bilirubin |  |
|--------------------------------------|----------------------|----------|-------------|----------|--------|----------|-----------|----------|--------------------|--|
| PDAC vs. benign                      | n = 161 vs. 49       |          |             |          |        |          |           |          |                    |  |
| AUC                                  | 0.914                | (0.908)  | 0.858       | (0.865)  | 0.754  | (0.753)  | 0.901     | (0.902)  |                    |  |
| R <sup>2</sup> <sub>Nagelkerke</sub> | 0.562                | (0.546)  | 0.421       | (0.429)  | 0.196  | (0.185)  | 0.490     | (0.483)  |                    |  |
| Intercept                            | 0                    | (−0.005) | 0           | (−0.074) | 0      | (−0.021) | 0         | (−0.019) |                    |  |
| Slope                                | 1.00                 | (0.989)  | 1.00        | (1.100)  | 1.00   | (0.996)  | 1.00      | (0.974)  |                    |  |
| Harrell's E <sub>max</sub>           | 0                    | (0.004)  | 0           | (0.033)  | 0      | (0.005)  | 0         | (0.009)  |                    |  |
| Malign vs. benign                    | n = 222 vs. 49       |          |             |          |        |          |           |          |                    |  |
| AUC                                  | 0.902                | (0.898)  | 0.846       | (0.856)  | 0.764  | (0.764)  | 0.891     | (0.895)  |                    |  |
| R <sup>2</sup> <sub>Nagelkerke</sub> | 0.492                | (0.470)  | 0.342       | (0.357)  | 0.182  | (0.174)  | 0.419     | (0.419)  |                    |  |
| Intercept                            | 0                    | (0.018)  | 0           | (−0.166) | 0      | (−0.027) | 0         | (−0.037) |                    |  |
| Slope                                | 1.00                 | (0.976)  | 1.00        | (1.173)  | 1.00   | (1.010)  | 1.00      | (1.024)  |                    |  |
| Harrell's E <sub>max</sub>           | 0                    | (0.008)  | 0           | (0.061)  | 0      | (0.008)  | 0         | (0.028)  |                    |  |
| PDAC vs. dCCA                        | n = 161 vs. 22       |          |             |          |        |          |           |          |                    |  |
| AUC                                  | 0.816                | (0.784)  | 0.689       | (0.689)  | 0.582  | (0.548)  | 0.655     | (0.627)  |                    |  |
| R <sup>2</sup> <sub>Nagelkerke</sub> | 0.242                | (0.195)  | 0.030       | (0.00)   | 0.0007 | (0.00)   | 0.030     | (0.00)   |                    |  |
| Intercept                            | 0                    | (0.116)  | 0           | (−1.555) | 0      | (−2.597) | 0         | (0.243)  |                    |  |
| Slope                                | 1.00                 | (0.907)  | 1.00        | (1.813)  | 1.00   | (2.463)  | 1.00      | (0.869)  |                    |  |
| Harrell's E <sub>max</sub>           | 0                    | (0.043)  | 0           | (0.326)  | 0      | (0.441)  | 0         | (0.080)  |                    |  |
